# Supplementary material for: Folate appended chitosan nanoparticles augment the stability, bioavailability and efficacy of insulin in diabetic rats following oral administration
Source: Royal Society of Chemistry journal article supplement (doi:10.1039/c5ra19115g), 2015-01-01
Supplement: c5ra19115g1.pdf [file c5ra19115g1.pdf]

**Folate appended chitosan nanoparticles augment the stability, bioavailability and efficacy  
of insulin in diabetic rats following oral administration**

Ashish Kumar Agrawal<sup>1,2\*</sup>, Dileep Urimi<sup>1</sup>, Harshad Harde<sup>1</sup>, Varun Kushwah<sup>1</sup>, Sanyog Jain<sup>1\*</sup>

<sup>1</sup>Centre for Pharmaceutical Nanotechnology, Department of Pharmaceutics, National Institute of Pharmaceutical Education and Research (NIPER), Sector 67, S.A.S. Nagar (Mohali) Punjab-160062 INDIA

<sup>2</sup>Current affiliation: James Graham Brown Cancer Center, University of Louisville, Louisville, KY, USA

Telephone: 0172-2292055, Fax: 0172-2214692

E-mail: ashishkumar.agrawal@louisville.edu; sanyogjain@niper.ac.in

***\*Corresponding authors***

## 1. Preparation of folate conjugated chitosan nanoparticles (FA-Ch-NPs)

Activated folic acid (Folate-NHS) was used for surface functionalization and to confirm whether the FA remains stable over the surface, NPs were prepared by using FA-NHS and the pellet of NPs was repeatedly washed (5 times) with PBS 7.4 and further subjected to FTIR spectroscopy (Figure S1).

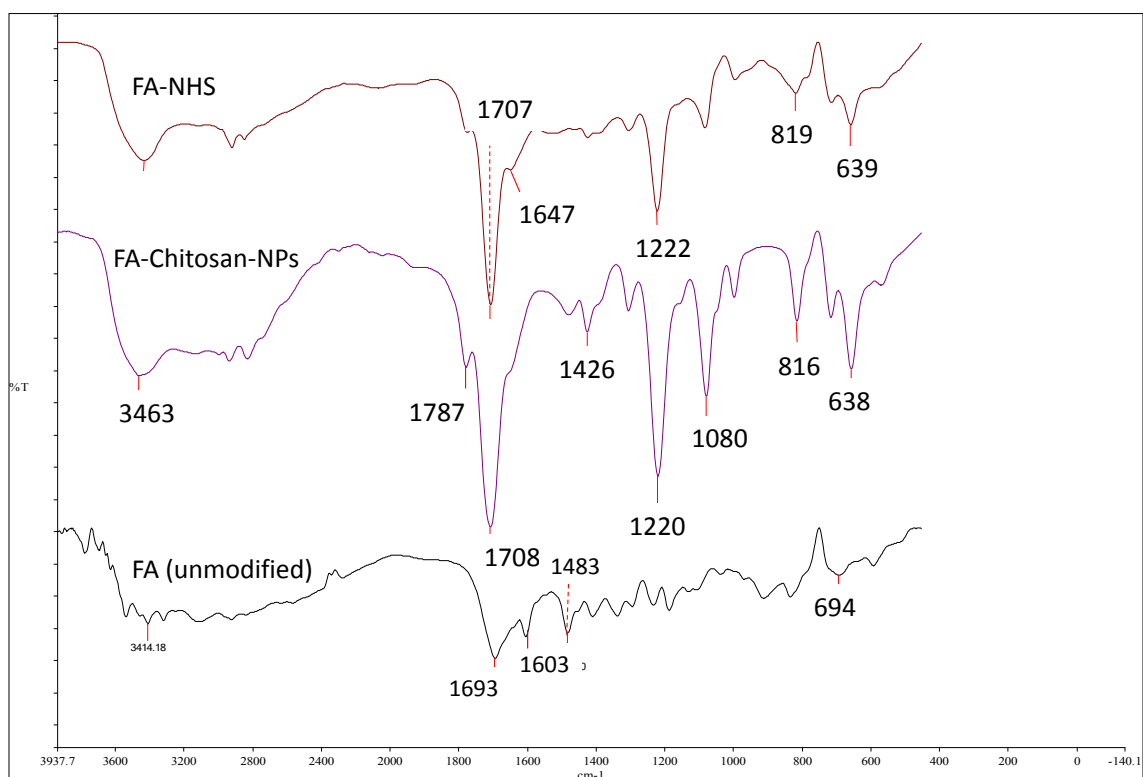

**Figure S1: Overlay FTIR spectra depicting the individual spectrum of FA, FA-NHS, Ch-NPs and FA-Ch-NPs formulated by using simple FA as well as FA-NHS**

Characteristic peaks representative of the amide I ( $\nu$  CO) and carboxyl stretching ( $\nu$  COOH) vibrations, native to the structure of FA were observed at 1603 and 1693  $\text{cm}^{-1}$ . After activation a sharp vibration band was observed at 1707  $\text{cm}^{-1}$  which was also observed in the FA-Ch-NPs formulated by using FA-NHS even after repeated washing which confirmed the physical stability of surface functionalization using activated FA.

**Table S1: Observations used for the optimization of chitosan nanoparticles by using central composite response surface design**

| Run | pH   | PSS   | Stirring Speed | Drug Loading |
|-----|------|-------|----------------|--------------|
| 1.  | 5    | 0.01  | 600            | 20           |
| 2.  | 5    | 0.01  | 1800           | 5            |
| 3.  | 5    | 0.1   | 600            | 5            |
| 4.  | 5    | 0.1   | 1800           | 20           |
| 5.  | 5.75 | 0.055 | 1200           | 12.5         |
| 6.  | 5.75 | 0.055 | 1200           | 12.5         |
| 7.  | 6.5  | 0.01  | 600            | 5            |
| 8.  | 6.5  | 0.01  | 1800           | 20           |
| 9.  | 6.5  | 0.1   | 600            | 20           |
| 10. | 6.5  | 0.1   | 1800           | 5            |
| 11. | 5    | 0.01  | 600            | 5            |
| 12. | 5    | 0.01  | 1800           | 20           |
| 13. | 5    | 0.1   | 600            | 20           |
| 14. | 5    | 0.1   | 1800           | 5            |
| 15. | 5.75 | 0.055 | 1200           | 12.5         |
| 16. | 5.75 | 0.055 | 1200           | 12.5         |
| 17. | 6.5  | 0.01  | 600            | 20           |
| 18. | 6.5  | 0.01  | 1800           | 5            |
| 19. | 6.5  | 0.1   | 600            | 5            |
| 20. | 6.5  | 0.1   | 1800           | 20           |
| 21. | 4.25 | 0.055 | 1200           | 12.5         |
| 22. | 5.75 | 0     | 1200           | 12.5         |
| 23. | 5.75 | 0.055 | 0              | 12.5         |
| 24. | 5.75 | 0.055 | 1200           | 0            |
| 25. | 5.75 | 0.055 | 1200           | 12.5         |
| 26. | 5.75 | 0.055 | 1200           | 12.5         |
| 27. | 5.75 | 0.055 | 1200           | 27.5         |
| 28. | 5.75 | 0.055 | 2400           | 12.5         |
| 29. | 5.75 | 0.145 | 1200           | 12.5         |
| 30. | 7.25 | 0.055 | 1200           | 12.5         |
